# Supplementary material for: Microscopic artificial cilia – a review
Source: PubMed Central journal article supplement — Lab Chip. 2022 Apr 4;22(9):1650–79. doi: 10.1039/d1lc01168e (PMC9063641; doi:10.1039/d1lc01168e), 2022-04-04
Supplement: LC-022-D1LC01168E-s001.pdf [file LC-022-D1LC01168E-s001.pdf]

## Supplementary Information

### Microscopic artificial cilia - a review<sup>†</sup>

Tanveer Ul Islam,<sup>ab</sup> Ye Wang,<sup>ab</sup> Ishu Aggarwal,<sup>c</sup> Zhiwei Cui,<sup>ab</sup> Hossein Eslami Amirabadi,<sup>ab</sup>  
Hemanshul Garg,<sup>ac</sup> Roel Kooi,<sup>ab</sup> Bhavana B. Venkataramanachar,<sup>ab</sup> Tongsheng Wang,<sup>ab</sup>  
Shuaizhong Zhang,<sup>ad</sup> Patrick R. Onck<sup>c</sup> and Jaap M.J. den Toonder<sup>\*ab</sup>

<sup>a</sup> *Microsystems, Department of Mechanical Engineering, Eindhoven University of Technology, 5612 AE, Eindhoven, The Netherlands, Tel: +31 40 247 5767, E-mail: J.M.J.d.Toonder@tue.nl*

<sup>b</sup> *Institute for Complex Molecular Systems (ICMS), Eindhoven University of Technology, 5612 AJ, Eindhoven, The Netherlands*

<sup>c</sup> *Zernike Institute for Advanced Materials, University of Groningen, 9747 AG, Groningen, The Netherlands*

<sup>d</sup> *Max Planck Institute for Intelligent Systems, Heisenbergstr. 3, 70569, Stuttgart, Germany*

Table S1: Fabrication methods along with materials used to fabricate artificial cilia and their sizes and other details reported in different studies are categorized here as per the flow chart shown in Fig. 5 of the main article. The type of motion named; rotation, back and forth of cilia is an approximation to tilted conical motion and 2D asymmetric motion respectively. Each section in the table is sorted as per the cilia sizes - smallest to largest.

| Fabrication method           | Ref. | Material                         | Size*<br>□:l×w×t μm<br>○:l×d μm | Application                 | Actuation/<br>Sensing<br>method | Type of<br>motion     |
|------------------------------|------|----------------------------------|---------------------------------|-----------------------------|---------------------------------|-----------------------|
| Template based (MEMS)        | 1    | PDMS, CrO2                       | 47×5.7                          | localized actuation         | magnetic/optic                  | -                     |
|                              | 2    | Cobalt NW                        | 50×0.07                         | flow/vibration              | magnetic                        | -                     |
|                              | 3    | hydrogel                         | 50×1-10                         | flow generation             | pH/magnetic/electric            | rotation              |
|                              | 4    | PDMS, CIP                        | 46-68.8×8.5-9.1                 | droplet manipulation        | magnetic                        | back and forth        |
|                              | 5    | PEG                              | 170×50                          | acoustic sensing            | piezoelectric                   | -                     |
|                              | 6    | PDMS, CIP                        | 350×50                          | fluid pumping               | magnetic                        | tilted conical        |
|                              | 7    | SU-8, Hydrogel                   | 400-800×50                      | flow sensing                | piezoelectric                   | -                     |
|                              | 8    | PDMS                             | 1000×100                        | flow generation             | ballchain wave excitation       | wave-like             |
|                              | 9    | PDMS, iron                       | 2000×400×100                    | flow generation             | magnetic                        | metachrony            |
| Template based 3D printing   | 10   | Ecoflex, NdFeB                   | 4000×800                        | flow                        | magnetic transport              | metachrony            |
|                              | 11   | PDMS                             | 4000×1500                       | air/water flow sensor       | -                               | -                     |
| Template free (MEMS)         | 12   | PDMAA                            | 70×20×0.9                       | flow generation             | magnetic                        | 2D asymmetric         |
|                              | 13   | MABP                             | 100×20×1.02                     | mixing                      | electrostatic                   | 2D asymmetric         |
|                              | 14   | Chromium, polymer                | 150×20×0.7                      | flow generation             | magnetic                        | metachrony            |
|                              | 15   | Ni-Fe                            | 300×100×15                      | fluid manipulation          | magnetic                        | 2D asymmetric         |
|                              | 16   | PDMS Fe-C                        | 480×10×0.055                    | fluid/particle manipulation | magnetic                        | 2D asymmetric         |
|                              | 17   | Ni-Fe permalloy                  | 500×50×0.11                     | mixing                      | electrochemical                 | channel compression   |
|                              | 18   | Au/PPy                           | 600×800                         | flow sensing                | piezoresistive                  | -                     |
|                              | 19   | SU-8                             | 4000×1500                       | sensor                      | magnetic                        | -                     |
|                              | 20   | Co,Ni, galfenol NW               | 1200×5000×370                   | flow sensing                | ionic polymer                   | -                     |
|                              | 20   | IPMC                             |                                 |                             |                                 |                       |
| Template free 3D/4D printing | 21   | fiber PVDF                       | $L/d = 500$                     | flow sensing                | piezoelectric                   | -                     |
|                              | 22   | Al                               | 3000×200                        | flow generation             | magnetic                        | metachrony            |
|                              | 23   | PU/CIP                           | 3000×240                        | transport                   | magnetic                        | metachrony, worm-like |
|                              | 24   | Sr-ferrite liquid crystal        | 10000×3000×10                   | actuator                    | optics                          | 2D asymmetric         |
| Cilia pulling                | 25   | PDMS, CIP                        | 250×-                           | fluid pumping               | magnetic                        | tilted conical        |
|                              | 26   | PET,PU,PS, PMMA,PVP              | 100000×100                      | humidity sensing            | optics                          | -                     |
| Needle punching              | 27   | PDMS                             | 2500×9-700                      | transport                   | magnetic                        | back and forth        |
|                              | 28   | Co powder                        | 2500×2500×200                   | flow generation             | acoustic                        | -                     |
|                              | 29   | metal-metaklett                  | 2800×130                        | mixing                      | magnetic                        | rotation              |
|                              | 30   | PDMS-NdFeB                       | 3500×9-700                      | transport                   | magnetic                        | back and forth        |
| PCTE molds                   | 31   | PDMS                             | 25×0.2-1                        | microfluidics               | magnetic                        | tilted conical        |
|                              | 32   | Maghemite, PDMS                  | 10-25×0.2-0.8                   | flow/mixing                 | magnetic                        | tilted conical        |
|                              | 33   | Maghemite, PDMS                  | 6-47×0.4-3                      | microfluidics/robotics      | magnetic                        | rotation              |
|                              | 34   | Magnetite composite Nickel, PDMS | -×2                             | blood clot stiffness        | magnetic                        | -                     |

Size\* □ = flap like cilia, ○ =cylindrical/conical cilia, l:length, w:width, t:thickness, d:diameter

Table S1 continued:

| Fabrication method | Ref.                             | Material                            | Size*<br>□:l×b×t μm<br>○:l×d μm | Application                    | Actuation/<br>Sensing<br>method | Type of<br>motion              |
|--------------------|----------------------------------|-------------------------------------|---------------------------------|--------------------------------|---------------------------------|--------------------------------|
| Micromachinig      | 35                               | PDMS-NdFeB                          | 300×50                          | mixing                         | magnetic                        | rotation                       |
|                    | 36                               | PDMS-NdFeB                          | 300×50                          | flow generation                | magnetic                        | rotation                       |
|                    | 37                               | PDMS-NdFeB                          | 400×50                          | pumping/<br>mixing             | magnetic                        | rotation                       |
|                    | 38                               | polyethylene, NW                    | -×50                            | vibration sensor               | magnetic                        | -                              |
|                    | 39                               | PDMS, CIP                           | 690×86                          | actuation                      | magnetic                        | metachrony                     |
|                    | 40                               | PDMS-NdFeB                          | 800×50                          | flow generation                | pneumatic                       | rotation                       |
|                    | 41                               | PDMS, Fe NW                         | 1000×200                        | tactile sensors                | magnetic                        | -                              |
|                    | 42                               | PMMA, PC                            | 2000×300                        | flow sensing                   | piezoresistive                  | -                              |
|                    | 43                               | PDMS-NdFeB                          | 2500×250                        | mixing                         | magnetic                        | rotation                       |
|                    | 44                               | Ecoflex-NdFeB                       | 7000×-                          | robots                         | magnetic                        | 2D<br>asymmetric<br>metachrony |
|                    | 45                               | PDMS-                               | 8000×1000                       | pumping                        | air pressure                    | metachrony                     |
|                    | 46                               | polyethylene NW                     | 6000-16000×1000                 | flow generation                | pneumatic                       | 2D<br>asymmetric               |
|                    | Part assembly                    | 47                                  | PMMA                            | 2000×300                       | flow sensor                     | electroactive<br>polymer       |
| 48                 |                                  | PMMA                                | 5000×500                        | flow sensor                    | piezoelectric                   | -                              |
| 49                 |                                  | Au                                  | 13000×320                       | actuation                      | electric                        | back and<br>forth              |
| 50                 |                                  | Cu                                  | 10000-20000×230                 | flow generation                | thermal                         | metachrony                     |
| 51                 |                                  | Plyethelene, Au                     | 16000-20000×10                  | flow generation                | electric                        | metachrony                     |
| 52                 |                                  | IPMC                                | 35000×2000×500                  | flow generation/<br>sensors    | electroactive<br>polymer        | rotation                       |
| 53                 |                                  | Au-IPMC, PC<br>nafion               | 38000×400×175                   | sensor                         | electroactive<br>polymer        | -                              |
| Self assembly      | 54                               | PPy NW, CoFe                        | 1×0.133-0.309                   | sensor                         | magnetic                        | -                              |
|                    | 55                               | paramagnetic<br>colloids            | 6×3                             | actuation                      | magnetic                        | rotation                       |
|                    | 56                               | ZnO nano sheets                     | -                               | photocatalytic<br>reaction     | magnetic                        | rotation                       |
|                    | 57                               | PAmPh Co<br>nano-magnetic beads     | 20×0.2                          | flow generation/<br>pH sensing | magnetic                        | rotation                       |
|                    | 58                               | Ecoflex-NdFeB Co                    | 20×0.2                          | particle<br>transport          | magnetic                        | rotation                       |
|                    | 59                               | PBA<br>magnetic beads               | 20×3                            | flow generation                | magnetic                        | tilted conical                 |
|                    | 60                               | superparamagnetic<br>spheres        | 30.8×1                          | flow generation                | magnetic                        | tilted conical                 |
|                    | 61                               | superparamagnetic<br>beads          | 38.8-40×-                       | pumping                        | magnetic                        | tilted conical                 |
|                    | 62                               | superparamagnetic<br>beads          | 45×50                           | flow generation                | magnetic                        | tilted conical                 |
|                    | 63                               | PAmPh, Co<br>nano-magnetic beads    | 10-100×0.4-0.8                  | mixing                         | photothermal                    | rotation                       |
|                    | 64                               | polystyrene<br>Co nanoparticles     | 40-200×-                        | flow pumping                   | magnetic                        | -                              |
|                    | 65                               | poly acrylic<br>colloidal particles | 50-300×-                        | pumping                        | magnetic                        | rotation                       |
|                    | 66                               | Carbon NW                           | 500×-                           | flow                           | electro-<br>osmosis             | back and<br>forth              |
|                    | 67                               | PDMS Co                             | 600×34                          | mixing                         | photothermal                    | rotation                       |
|                    | 68                               | PDMS, Co powder                     | 920×40                          | mixing                         | magnetic                        | -                              |
|                    | 69                               | PDMS Co                             | 500-1000×20-80                  | sensing                        | magnetic,<br>pressure           | -                              |
|                    | 70                               | PDMS, Co powder                     | 1340-1730×-                     | mixing                         | magnetic                        | back and<br>forth              |
|                    | 71                               | PDMS, Co powder                     | 1340-1730×-                     | photocatalytic<br>reaction     | magnetic                        | -                              |
|                    | 72                               | polyurethane, CIP                   | 250-2000×-                      | flow generation                | photothermal                    | back and<br>forth              |
|                    | 73                               | PDMS Co                             | 500-2500×100-300                | sensing                        | magnetic                        | -                              |
| 74                 | PS-CoNP                          | 3000×250                            | -                               | magnetic                       | -                               |                                |
| 75                 | polystyrene, Co                  | 1000-6000×-                         | mixing                          | magnetic                       | back and<br>forth               |                                |
| 76                 | polystyrene<br>Co nano particles | 15000-5000×0.235                    | acuation                        | magnetic                       | back and<br>forth               |                                |

Size\* □ = flap like cilia, ○ =cylindrical/conical cilia, l:length, b:width, t:thickness, d:diameter

Table S2: Comparison of particle and droplet manipulation methods using artificial cilia, published in the recent literature.

| Ref. | Cilia Type                                  | Cilia Geometry<br>□ : $l \times w \times t [\mu m^3]$<br>○ : $l \times d [\mu m^2]$ | Cilia Motion                | Particle/<br>Type                           | Particle/<br>Droplet<br>Size<br>( $\mu m / \mu L$ ) | Particle/<br>Manipulation                                                       | Maximum<br>Transport<br>Speed<br>( $\mu m/s$ ) |
|------|---------------------------------------------|-------------------------------------------------------------------------------------|-----------------------------|---------------------------------------------|-----------------------------------------------------|---------------------------------------------------------------------------------|------------------------------------------------|
| 77   | cylindrical<br>magnetic<br>artificial cilia | 40×5                                                                                | bending                     | water droplet,<br>silicon carbide           | 60<br>50                                            | transportation,<br>capture and<br>release                                       | 200<br>320                                     |
| 78   | rectangular<br>magnetic<br>artificial cilia | 46×17                                                                               | bending                     | water droplet                               | 10 $\mu L$                                          | forward and<br>backward<br>transportation                                       | -                                              |
| 79   | mushroom-like<br>magnetic<br>pillar array   | (127 ± 28) × (27 ± 8),<br>(139 ± 32) × (42 ± 14)                                    | bending and<br>oil droplets | water droplet,                              | 13 $\mu L$                                          | transportation<br>on a inclined<br>surface,<br>capture and<br>release           | -                                              |
| 80   | cylindrical<br>magnetic<br>artificial cilia | 350 × 50                                                                            | 3D conical<br>motion        | micro algae                                 | 12                                                  | removal                                                                         | -                                              |
| 81   | cylindrical<br>magnetic<br>artificial cilia | 350 × 50                                                                            | 3D conical<br>motion        | PLA particles<br>in water,<br>sand grains   | 30 – 500<br>500 – 2000                              | removal                                                                         | -                                              |
| 82   | cylindrical<br>magnetic<br>artificial cilia | 350 × 50                                                                            | 3D tilted<br>conical motion | PLA particles<br>in water                   | 400 – 800                                           | multi-directional<br>transportation                                             | 800                                            |
| 83   | conical<br>magnetic<br>artificial cilia     | (800 – 1200) ×<br>(60 – 100)                                                        | bending                     | water droplet                               | 10 $\mu L$                                          | omnidirectional<br>controllable<br>water delivery                               | -                                              |
| 84   | magnetic<br>flap-shaped                     | 940 × 2390 × 93                                                                     | metachronal<br>motion       | water droplets,<br>liquid metal<br>in water | 2 – 10 $\mu L$                                      | horizontal<br>and vertical<br>transportation,<br>capture and release,<br>mixing | 5860                                           |
| 85   | cylindrical<br>magnetic<br>artificial cilia | 1014 × (125 – 205)                                                                  | metachronal<br>motion       | water droplet                               | 1-6 $\mu L$                                         | unidirectional<br>transportation<br>on specific orbit                           | -                                              |
| 86   | magnetic<br>pillar array                    | 1300 × 130                                                                          | -                           | water droplet,<br>ice particles             | 10 $\mu L$                                          | multidirectional<br>transportation                                              | -                                              |
| 87   | conical<br>magnetic<br>artificial cilia     | L=3000                                                                              | metachroanl<br>motion       | PS particles                                | 2500                                                | horizontal<br>transportation                                                    | 900                                            |
| 88   | conical<br>magnetic<br>artificial cilia     | 3500 × 2                                                                            | metachroanl<br>motion       | SiO <sub>2</sub> in water                   | 2500                                                | horizontal<br>transportation                                                    | 73                                             |
| 89   | conical<br>magnetic<br>artificial cilia     | L=2500 – 4000                                                                       | metachronal<br>motion       | water droplet,<br>oil droplet<br>in water   | 2100 – 4200                                         | transportation on<br>horizontal and<br>inclined surfaces                        | 28300<br>31500                                 |

Size\* □ = flap like cilia, ○ =cylindrical/conical cilia, l:length, b:width, t:thickness, d:diameter

Table S3: The applications in which cilia structures are used to sense flow in a liquid/ gaseous medium are sorted by its size in the interest of finding relevant methods of sensing in microfluidics. The flow velocity, the level of vibrations in liquid/ air (Hydrophones) and the acceleration of fluids (accelerometer) the cilia based sensors can measure are also presented.

| Sensing principle | Ref.             | Material                      | Size*<br>□: l×w×t μm<br>○: l×d μm | Medium                   | Flow velocity       | Flow measurement resolution         |
|-------------------|------------------|-------------------------------|-----------------------------------|--------------------------|---------------------|-------------------------------------|
| Piezoresistive    | 90               | permalloy                     | 820×0-10×100                      | water                    | 1 m/s               | -                                   |
|                   | 91               | -                             | 800×400×250                       | air                      | 10s of cm/s to 2m/s | -                                   |
|                   | 18               | Si+SU8                        | 700×-                             | air/water                | -                   | < 1 m/s                             |
|                   | 92               | AlN <sub>3</sub> + Mo         | (200-600)×100×0.7                 | water                    | 0.3 bar             | 0.025 bar                           |
|                   | 93               | red wax                       | 1000×100×40                       | water                    | -                   | 184.2 dB                            |
|                   | 94               | permalloy,<br>Cr/Au, Al       | (600-1500)×10×200                 | air                      | 0-30 m/s            | -                                   |
|                   | 42               | PMMA                          | 2000×300                          | nanoindenter             | -                   | -                                   |
|                   | 47               | PMMA                          | 2000×300                          | water                    | 0-100 L/min         | -                                   |
|                   | 95               | PMMA+PC                       | 2000×300                          | water                    | -                   | -                                   |
|                   | 96,97            | PU                            | 3000×500                          | -                        | -                   | -                                   |
|                   | 98               | Si + SiO <sub>2</sub>         | (1500-3500)×130×20                | water<br>(hydrophone)    | 20 Hz - 3 kHz       | -(182-192) dB                       |
|                   | 99               | glass fibre<br>+CNT           | (750-4000)×(25-36)                | air                      | 12 m/s              | -                                   |
|                   | 11               | graphene<br>+PDMS             | 4000×1500                         | air                      | 90 m/s              | -                                   |
|                   | 100              | plastic                       | 5000×150                          | water<br>(hydrophone)    | 20 Hz - 2 kHz       | -165 dB                             |
|                   | 101              | photosensitive<br>resin       | 5000×175                          | water                    | 0-200Hz             | $2.73 \times 10^{-2}$<br>$Vms^2/kg$ |
|                   | 102              | optical<br>fibre              | 5000×200                          | water<br>(accelerometer) | -                   | x=0.755 mV/g,<br>y=0.683 mV/g       |
|                   | 103              | Si                            | 5000×200                          | air<br>(accelerometer)   | 0-1000 Hz           | x=0.755 mV/g,<br>y=0.683 mV/g       |
|                   | 104              | optical<br>fibre              | (3500-5000)×<br>(100-120)×20      | water<br>(hydrophone)    | -                   | -185 dB                             |
|                   | 105              | Si                            | 7000×200                          | water                    | 0-1 Hz              | 0.7552 mV/g                         |
|                   | 106              | Si                            | 8000×400                          | water                    | 0.6                 | 0.05m/s                             |
| 107               | Cu               | 8000×2000×100                 | water                             | 0.45 m/s                 | 0.05 m/s            |                                     |
| 108               | Cu               | 8000×2000×100                 | water                             | 0.45 m/s                 | 0.05 m/s            |                                     |
| 109               | PDMS,<br>GNP ink | (10000-20000)×3000            | air/<br>water                     | 0-9 m/s<br>-             | -<br>16-30μm/s      |                                     |
| 110               | -                | 20600×3000                    | air/water                         | 0-500 m/s                | 4.93 mm/s           |                                     |
| Piezoelectric     | 111              | PVDF                          | -×25                              | air                      | -                   | -                                   |
|                   | 7                | SU-8,<br>hydrogel             | 400-800×50                        | water                    | -                   | -                                   |
|                   | 112              | CNT                           | 4000×350                          | air/water                | -                   | 5 mm/s                              |
|                   | 113              | VACNT                         | -                                 | water                    | -                   | 5 mm/s                              |
|                   | 48               | PMMA                          | -                                 | water                    | -                   | 0.23 mm/s                           |
|                   | 114              | CNT+Pt                        | 1500×260                          | air                      | -                   | 5 mm/s                              |
|                   | 115              | BaTiO <sub>3</sub><br>plastic | 4000×350                          | water                    | 20 Hz - 2 kHz       | -189.3 dB                           |
| Capacitive        | 116              | SU-8                          | 500×50                            | air                      | 0.6 m/s             | -                                   |
|                   | 117              | SU-8                          | 900×50                            | air                      | -                   | -                                   |
|                   | 118              | SU-8                          | 1000×-                            | air                      | 0.1-1 m/s           | -                                   |
|                   | 119              | -                             | 1900×220                          | air                      | 0-15 m/s            | 2 cm/s                              |
|                   | 120              | ecoflex,<br>liquid metal      | 5000×5000×175                     | water                    | 0.06 m/s            | -                                   |
|                   | 121              | hydrogels                     | 18000×260×100                     | -                        | -                   | -                                   |

Size\* □ = flap like cilia, ○ =cylindrical/conical cilia, l:length, w:width, t:thickness, d:diameter

Table S3 continued:

| Sensing principle | Ref.    | Material                       | Size*<br>□:l×w×t μm<br>○:l×d μm | Medium        | Flow velocity        | Flow measurement resolution |
|-------------------|---------|--------------------------------|---------------------------------|---------------|----------------------|-----------------------------|
| Magnetic          | 122     | Fe-Ga NW                       | -×0.001-0.1                     | air           | 300 Hz - 5 kHz       | -                           |
|                   | 54      | PPy NW                         | 1×0.08-0.2                      | air           | -                    | -                           |
|                   | 123     | Fe-Ga NW                       | 5×0.1                           | air           | -                    | -                           |
|                   | 2       | Co NW                          | 50×0.7                          | water,<br>Air | 6 mL/min<br>1-5Hz    | 136 μL/min                  |
|                   | 124,125 | Fe-Ga NW                       | 25-100×0.02-0.2                 | Liquids       | 400 Hz - 10 kHz      | -                           |
|                   | 126,127 | Fe NW,<br>PDMS/SU-8<br>PS-CoNP | 500×100, 20×5<br>3000×250       | water<br>-    | 7.8 mm/s<br>-        | 0.56 mm/s<br>-              |
| Other types       |         |                                |                                 |               |                      |                             |
| FSR               | 96,97   | polyurethane                   | 3000×500×100                    | -             | -                    | 245 ppm/μm                  |
|                   | 47      | PMMA                           | 2000×300, 20×5                  | water         | 0-100 L/min          |                             |
| IMPS              | 42      | PMMA                           | 2000×300, 20×5                  | water         | 0-100 L/min          |                             |
|                   | 20      | nafion                         | 500×1200×370                    | -             | -                    | -                           |
| Resonance         | 128     | polymer                        | 9000×1000                       | air           | 43.27 and 41.85 mm/s | -                           |
|                   | 129     | ABS<br>hollow post             | 8000×800                        | air           | -                    | -                           |

Size\* □ = flap like cilia, ○ =cylindrical/conical cilia, l:length, b:width, t:thickness, d:diameter

## References

- [1] M. Li, T. Kim, G. Guidetti, Y. Wang and F. G. Omenetto, *Advanced Materials*, 2020, **32**, 2004147.
- [2] M. A. Hein, M. M. Maqableh, M. J. Delahunt, M. Tondra, A. B. Flatau, C. K. Shield and B. J. Stadler, *IEEE transactions on magnetics*, 2012, **49**, 191–196.
- [3] P. Glazer, J. Leuven, H. An, S. Lemay and E. Mendes, *Advanced functional materials*, 2013, **23**, 2964–2970.
- [4] A. Al-Azawi, C. Hörenz, T. Tupasela, O. Ikkala, V. Jokinen, S. Franssila and R. H. Ras, *AIP Advances*, 2020, **10**, 085021.
- [5] S. Orbay, A. Ozcelik, H. Bachman and T. J. Huang, *Journal of Micromechanics and Microengineering*, 2018, **28**, year.
- [6] S. Zhang, Y. Wang, R. Lavrijsen, P. R. Onck and J. M. den Toonder, *Sensors and Actuators B: Chemical*, 2018, **263**, 614–624.
- [7] M. Asadnia, A. G. P. Kottapalli, K. D. Karavitaki, M. E. Warkiani, J. Miao, D. P. Corey and M. Triantafyllou, *Scientific reports*, 2016, **6**, 1–13.
- [8] A. Keißner and C. Brücker, *Soft Matter*, 2012, **8**, 5342–5349.
- [9] F. Tsumori, R. Marume, A. Saijou, K. Kudo, T. Osada and H. Miura, *Japanese Journal of Applied Physics*, 2016, **55**, 06GP19.
- [10] H. Gu, Q. Boehler, H. Cui, E. Secchi, G. Savorana, C. De Marco, S. Gervasoni, Q. Peyron, T.-Y. Huang, S. Pane, A. M. Hirt, D. Ahmed and B. J. Nelson, *Nature Communications*, 2020, **11**, 2637.
- [11] A. M. Kamat, Y. Pei and A. G. Kottapalli, *Nanomaterials*, 2019, **9**, 954.
- [12] J. Belardi, N. Schorr, O. Prucker and J. Rühle, *Advanced Functional Materials*, 2011, **21**, 3314–3320.
- [13] J. den Toonder, F. Bos, D. Broer, L. Filippini, M. Gillies, J. de Goede, T. Mol, M. Reijme, W. Talen, H. Wilderbeek *et al.*, *Lab on a Chip*, 2008, **8**, 533–541.
- [14] S. Hanasoge, P. J. Hesketh and A. Alexeev, *ACS Applied Materials & Interfaces*, 2020, **12**, 46963–46971.
- [15] F. Fahrni, M. W. J. Prins and L. J. van IJzendoorn, *Lab Chip*, 2009, **9**, 3413–3421.
- [16] S. Hanasoge, P. J. Hesketh and A. Alexeev, *Soft Matter*, 2018, **14**, 3689–3693.
- [17] X. C. i Solvas, R. A. Lambert, L. Kulinsky, R. H. Rangel and M. J. Madou, *Microfluidics and nanofluidics*, 2011, **11**, 405–416.
- [18] N. Chen, C. Tucker, J. M. Engel, Y. Yang, S. Pandya and C. Liu, *Journal of microelectromechanical systems*, 2007, **16**, 999–1014.
- [19] P. D. McGary, L. Tan, J. Zou, B. J. Stadler, P. R. Downey and A. B. Flatau, *Journal of Applied Physics*, 2006, **99**, 08B310.
- [20] H. Lei, W. Li and X. Tan, Electroactive Polymer Actuators and Devices (EAPAD) 2012, 2012, p. 83401A.
- [21] F. Li, W. Liu, C. Stefanini, X. Fu and P. Dario, *Sensors*, 2010, **10**, 994–1011.
- [22] S. Azukizawa, H. Shinoda, K. Tokumaru and F. Tsumori, *Journal of Photopolymer Science and Technology*, 2018, **31**, 139–144.
- [23] H. Shinoda, S. Azukizawa, K. Maeda and F. Tsumori, *Journal of The Electrochemical Society*, 2019, **166**, B3235.
- [24] C. L. van Oosten, C. W. M. Bastiaansen and D. J. Broer, *Nature Materials*, 2009, **8**, 677–682.
- [25] Y. Wang, J. den Toonder, R. Cardinaels and P. Anderson, *Lab on a Chip*, 2016, **16**, 2277–2286.
- [26] W. Jeong, S.-M. Jeong, T. Lim, C.-Y. Han, H. Yang, B. W. Lee, S. Y. Park and S. Ju, *ACS applied materials & interfaces*, 2019, **11**, 35286–35293.
- [27] Y. Wang, X. Chen, K. Sun, K. Li, F. Zhang, B. Dai, J. Shen, G. Hu and S. Wang, *Science China Materials*, 2019, **62**, 236–244.

- [28] A. Backer, J. Landskron, K. S. Drese and G. Lindner, *Journal of Bionic Engineering*, 2021, **18**, 534–547.
- [29] M. Rahbar, L. Shannon and B. L. Gray, *Journal of Micromechanics and Microengineering*, 2013, **24**, 025003.
- [30] B. Dai, S. Li, T. Xu, Y. Wang, F. Zhang, Z. Gu and S. Wang, *ACS applied materials & interfaces*, 2018, **10**, 42979–42984.
- [31] B. Evans, A. Shields, R. L. Carroll, S. Washburn, M. Falvo and R. Superfine, *Nano letters*, 2007, **7**, 1428–1434.
- [32] A. R. Shields, B. L. Fiser, B. A. Evans, M. R. Falvo, S. Washburn and R. Superfine, *Proceedings of the National Academy of Sciences*, 2010, **107**, 15670–15675.
- [33] T. Ul Islam, Y. Bellouard and J. M. den Toonder, *Proceedings of the National Academy of Sciences*, 2021, **118**, year.
- [34] R. M. Judith, J. K. Fisher, R. C. Spero, B. L. Fiser, A. Turner, B. Oberhardt, R. Taylor, M. R. Falvo and R. Superfine, *Lab on a Chip*, 2015, **15**, 1385–1393.
- [35] C.-Y. Chen, C.-Y. Chen, C.-Y. Lin and Y.-T. Hu, *Lab on a Chip*, 2013, **13**, 2834–2839.
- [36] C.-Y. Chen, C.-Y. Lin and Y.-T. Hu, *Experiments in fluids*, 2014, **55**, 1765.
- [37] Y.-A. Wu, B. Panigrahi, Y.-H. Lu and C.-Y. Chen, *Micromachines*, 2017, **8**, 260.
- [38] Q. He, Y. Wu, Z. Feng, C. Sun, W. Fan, Z. Zhou, K. Meng, E. Fan and J. Yang, *Nano Energy*, 2019, **59**, 689–696.
- [39] R. Marume, F. Tsumori, K. Kudo, T. Osada and K. Shinagawa, *Japanese Journal of Applied Physics*, 2017, **56**, 06GN15.
- [40] T.-C. Li, B. Panigrahi, W.-T. Chen, C.-Y. Chen and C.-Y. Chen, *Sensors and Actuators A: Physical*, 2020, **313**, 112184.
- [41] A. Alfadhel, M. A. Khan, S. C. de Freitas and J. Kosel, *IEEE Sensors Journal*, 2016, **16**, 8700–8705.
- [42] H. Lee, B.-K. Lee and T. Kwon, 2009 IEEE 22nd International Conference on Micro Electro Mechanical Systems, 2009, pp. 789–792.
- [43] C.-H. Lu, C.-H. Tang, N. Ghayal, B. Panigrahi, C.-Y. Chen and C.-Y. Chen, *Sensors and Actuators A: Physical*, 2019, **285**, 234–240.
- [44] G. Z. Lum, Z. Ye, X. Dong, H. Marvi, O. Erin, W. Hu and M. Sitti, *Proceedings of the National Academy of Sciences*, 2016, **113**, E6007–E6015.
- [45] B. Gorissen, M. de Volder and D. Reynaerts, *Lab Chip*, 2015, **15**, 4348–4355.
- [46] E. Milana, B. Gorissen, S. Peerlinck, M. De Volder and D. Reynaerts, *Advanced Functional Materials*, 2019, **29**, 1900462.
- [47] C. Y. Kim, H. S. Lee, Y. H. Cho, C. Joh, P. Choi and S. J. Park, *Smart Sensors, Actuators, and MEMS V*, 2011, p. 80662F.
- [48] X. Hu, Y. Jiang, Z. Ma, Y. Xu and D. Zhang, *Sensors*, 2019, **19**, 5384.
- [49] H. Sugioka, N. Nakano and Y. Mizuno, *Journal of the Physical Society of Japan*, 2019, **88**, 084801.
- [50] H. Sugioka, W. Tomita and M. Tanaka, *Journal of Applied Physics*, 2021, **129**, 244701.
- [51] H. Sugioka and H. Yoshijima, *Colloids and Surfaces A: Physicochemical and Engineering Aspects*, 2021, 127023.
- [52] S. Sareh, A. Conn, J. Rossiter, I. Ieropoulos and P. Walters, *Electroactive Polymer Actuators and Devices (EAPAD) 2010*, 2010, p. 76421S.
- [53] J. Rossiter, B. Stoimenov and T. Mukai, 2006 IEEE International Symposium on MicroNanoMechanical and Human Science, 2006, pp. 1–6.



- [54] P. Schroeder, J. Schotter, A. Shoshi, M. Eggeling, O. Bethge, A. Hütten and H. Brückl, *Bioinspiration & biomimetics*, 2011, **6**, 046007.
- [55] N. Coq, A. Bricard, F.-D. Delapierre, L. Malaquin, O. Du Roure, M. Fermigier and D. Bartolo, *Physical review letters*, 2011, **107**, 014501.
- [56] F. Peng, Q. Zhou, C. Lu, Y. Ni, J. Kou and Z. Xu, *Applied Surface Science*, 2017, **394**, 115–124.
- [57] L. Kong, Y. Feng, W. Luo, F. Mou, K. Ying, Y. Pu, M. You, K. Fang, H. Ma and J. Guan, *Advanced Functional Materials*, 2020, **30**, 2005243.
- [58] A. F. Demirörs, S. Aykut, S. Ganzeboom, Y. A. Meier, R. Hardeman, J. de Graaf, A. J. Mathijssen, E. Poloni, J. A. Carpenter, C. Ünlü *et al.*, *Advanced Science*, 2021, 2102510.
- [59] Y. Wang, Y. Gao, H. Wyss, P. Anderson and J. den Toonder, *Lab on a Chip*, 2013, **13**, 3360–3366.
- [60] G. Kokot, M. Vilfan, N. Osterman, A. Vilfan, B. Kavčič, I. Poberaj and D. Babič, *Biomicrofluidics*, 2011, **5**, 034103.
- [61] M. Vilfan, G. Kokot, A. Vilfan, N. Osterman, B. Kavčič, I. Poberaj and D. Babič, *Beilstein journal of nanotechnology*, 2012, **3**, 163–171.
- [62] M. Vilfan, A. Potočnik, B. Kavčič, N. Osterman, I. Poberaj, A. Vilfan and D. Babič, *Proceedings of the National Academy of Sciences*, 2010, **107**, 1844–1847.
- [63] A. Grein-Iankovski, A. Graillot, M. Radiom, W. Loh and J.-F. Berret, *The Journal of Physical Chemistry C*, 2020, **124**, 26068–26075.
- [64] J. L. Breidenich, M. C. Wei, G. V. Clatterbaugh, J. J. Benkoski, P. Y. Keng and J. Pyun, *Soft Matter*, 2012, **8**, 5334–5341.
- [65] A. Babataheri, M. Roper, M. Fermigier and O. Du Roure, *Journal of Fluid Mechanics*, 2011, **678**, 5–13.
- [66] H. Sugioka and M. Ishikawa, *AIP Advances*, 2020, **10**, 055302.
- [67] M. Sun, Q. Wang, B. Dai, W. Sun, Y. Ni, C. Lu and J. Kou, *Energy & Fuels*, 2020, **34**, 10290–10298.
- [68] D. Zhang, W. Wang, F. Peng, J. Kou, Y. Ni, C. Lu and Z. Xu, *Nanoscale*, 2014, **6**, 5516–5525.
- [69] Y.-F. Liu, Y.-F. Fu, Y.-Q. Li, P. Huang, C.-H. Xu, N. Hu and S.-Y. Fu, *Journal of Materials Chemistry B*, 2018, **6**, 896–902.
- [70] L. Sun and Y. Zheng, *Frontiers of Materials Science*, 2015, **9**, 178–184.
- [71] W. Wang, X. Huang, M. Lai and C. Lu, *RSC advances*, 2017, **7**, 10517–10523.
- [72] J. A.-C. Liu, B. A. Evans and J. B. Tracy, *Advanced Materials Technologies*, 2020, **5**, 2000147.
- [73] Q. Zhou, B. Ji, Y. Wei, B. Hu, Y. Gao, Q. Xu, J. Zhou and B. Zhou, *Journal of Materials Chemistry A*, 2019, **7**, 27334–27346.
- [74] A. Virta, J. V. Timonen, R. H. Ras and Q. Zhou, 2012 IEEE/RSJ International Conference on Intelligent Robots and Systems, 2012, pp. 1–6.
- [75] J. V. Timonen, C. Johans, K. Kontturi, A. Walther, O. Ikkala and R. H. Ras, *ACS applied materials & interfaces*, 2010, **2**, 2226–2230.
- [76] J. J. Benkoski, R. M. Deacon, H. B. Land, L. M. Baird, J. L. Breidenich, R. Srinivasan, G. V. Clatterbaugh, P. Y. Keng and J. Pyun, *Soft Matter*, 2010, **6**, 602–609.
- [77] Z. Wang, K. Wang, D. Liang, L. Yan, K. Ni, H. Huang, B. Li, Z. Guo, J. Wang, X. Ma *et al.*, *Advanced Materials*, 2020, **32**, 2001879.
- [78] Y. Lin, Z. Hu, M. Zhang, T. Xu, S. Feng, L. Jiang and Y. Zheng, *Advanced Functional Materials*, 2018, **28**, 1800163.
- [79] H. Wang, Z. Zhang, Z. Wang, Y. Liang, Z. Cui, J. Zhao, X. Li and L. Ren, *ACS applied materials & interfaces*, 2019, **11**, 28478–28486.

- [80] S. Zhang, P. Zuo, Y. Wang, P. Onck and J. M. d. Toonder, *ACS applied materials & interfaces*, 2020, **12**, 27726–27736.
- [81] S. Zhang, Y. Wang, P. R. Onck and J. M. den Toonder, *Advanced Functional Materials*, 2019, **29**, 1806434.
- [82] S. Zhang, R. Zhang, Y. Wang, P. R. Onck and J. M. den Toonder, *ACS nano*, 2020, **14**, 10313–10323.
- [83] M. Cao, X. Jin, Y. Peng, C. Yu, K. Li, K. Liu and L. Jiang, *Advanced Materials*, 2017, **29**, 1606869.
- [84] S. Jiang, Y. Hu, H. Wu, R. Li, Y. Zhang, C. Chen, C. Xue, B. Xu, W. Zhu, J. Li *et al.*, *Nano Letters*, 2020, **20**, 7519–7529.
- [85] Y. Song, S. Jiang, G. Li, Y. Zhang, H. Wu, C. Xue, H. You, D. Zhang, Y. Cai, J. Zhu *et al.*, *ACS Applied Materials & Interfaces*, 2020, **12**, 42264–42273.
- [86] J. H. Kim, S. M. Kang, B. J. Lee, H. Ko, W.-G. Bae, K. Y. Suh, M. K. Kwak and H. E. Jeong, *Scientific reports*, 2015, **5**, 1–10.
- [87] S. Ben, J. Tai, H. Ma, Y. Peng, Y. Zhang, D. Tian, K. Liu and L. Jiang, *Advanced Functional Materials*, 2018, **28**, 1706666.
- [88] S. Ben, J. Yao, Y. Ning, Z. Zhao, J. Zha, D. Tian, K. Liu and L. Jiang, *Science China Chemistry*, 2020, **63**, 347–353.
- [89] S. Ben, T. Zhou, H. Ma, J. Yao, Y. Ning, D. Tian, K. Liu and L. Jiang, *Advanced Science*, 2019, **6**, 1900834.
- [90] Z. Fan, J. Chen, J. Zou, D. Bullen, C. Liu and F. Delcomyn, *Journal of micromechanics and microengineering*, 2002, **12**, 655.
- [91] Y. Ozaki, T. Ohyama, T. Yasuda and I. Shimoyama, Proceedings IEEE Thirteenth Annual International Conference on Micro Electro Mechanical Systems (Cat. No. 00CH36308), 2000, pp. 531–536.
- [92] A. Quattieri, F. Rizzi, M. T. Todaro, A. Passaseo, R. Cingolani and M. De Vittorio, *Microelectronic Engineering*, 2011, **88**, 2376–2378.
- [93] P. Chen, G. Zhang, X. Yang, S. Ji, X. Liang, T. Lv, X. Zhang, S. Zhu, Z. Shang and W. Zhang, *Sensors and Actuators A: Physical*, 2021, **331**, 112575.
- [94] J. Chen, Z. Fan, J. Engel and C. Liu, Proceedings 2003 IEEE/RSJ International Conference on Intelligent Robots and Systems (IROS 2003)(Cat. No. 03CH37453), 2003, pp. 2341–2346.
- [95] J. S. Han, C. Y. Kim, C. Joh and S. J. Park, *Microsystem Technologies*, 2016, **22**, 2329–2339.
- [96] J. Engel, J. Chen, D. Bullen and C. Liu, 18th IEEE International Conference on Micro Electro Mechanical Systems, 2005. MEMS 2005., 2005, pp. 279–282.
- [97] J. Engel, J. Chen, N. Chen, S. Pandya and C. Liu, SENSORS, 2005 IEEE, 2005, pp. 4–pp.
- [98] L. Guan, G. Zhang, J. Xu, C. Xue, W. Zhang and J. Xiong, *Sensors and Actuators A: Physical*, 2012, **188**, 35–40.
- [99] K. A. Slinker, C. Kondash, B. T. Dickinson and J. W. Baur, *Advanced Materials Technologies*, 2016, **1**, 1600176.
- [100] Z. Guojun, W. Panpan, G. Linggang, X. Jijun and Z. Wendong, *Microelectronics journal*, 2011, **42**, 815–819.
- [101] S. Yang, J. Miao, T. Lv, W. Zhang, G. Zhang, C. Xue, W. Zhang and R. Wang, *Sensors and Actuators A: Physical*, 2021, 113109.
- [102] G. X. Shi, G. J. Zhang, X. B. Liu, X. Y. Wang and J. Xu, *Applied Mechanics and Materials*, 2012, pp. 4465–4470.
- [103] L. Zhen, Z. Guojun, X. Chenyang and W. Shujuan, *Journal of Semiconductors*, 2013, **34**, 114015.
- [104] G. J. Zhang, L. X. Liu, W. D. Zhang and C. Y. Xue, *Microsystem Technologies*, 2015, **21**, 1697–1708.
- [105] W. D. Zhang, L. G. Guan, G. J. Zhang, C. Y. Xue, K. R. Zhang and J. P. Wang, *Sensors*, 2009, **9**, 6823–6834.

- [106] W. Liu, F. Li, C. Stefanini, D. Chen and P. Dario, *Robotics and Autonomous Systems*, 2010, **58**, 1138–1148.
- [107] M. Nawi, A. A. Manaf, M. Arshad and O. Sidek, 2012.
- [108] M. N. M. Nawi, A. Manaf, M. R. Arshad and O. Sidek, *Proceeding Conference on Simulation of Semiconductor Processes and Devices (SISPAD 2012)*, 2012, pp. 161–164.
- [109] A. M. Kamat, X. Zheng, B. Jayawardhana and A. G. P. Kottapalli, *Nanotechnology*, 2020, **32**, 095501.
- [110] L.-G. Tran and W.-T. Park, *International Journal of Precision Engineering and Manufacturing-Green Technology*, 2020, 1–11.
- [111] L. Weiting, S. Bilsay, S. Cesare, M. Arianna, L. Fei, C. Dajing, D. Paolo, S. Metin and F. Xin, 2008 IEEE International Conference on Robotics and Biomimetics, 2009, pp. 49–54.
- [112] M. Bora, A. G. P. Kottapalli, J. Miao and M. S. Triantafyllou, *NPG Asia Materials*, 2017, **9**, e440–e440.
- [113] A. G. P. Kottapalli, M. Bora, D. Sengupta, J. Miao and M. S. Triantafyllou, 2018 IEEE SENSORS, 2018, pp. 1–4.
- [114] L.-G. Tran, D.-H. Joo and W.-T. Park, 2019 20th International conference on solid-state sensors, actuators and microsystems & eurosensors XXXIII (TRANSDUCERS & EUROSENSORS XXXIII), 2019, pp. 1937–1940.
- [115] S. Shi, W. Geng, K. Bi, J. He, X. Hou, J. Mu, F. Li and X. Chou, *Sensors and Actuators A: Physical*, 2020, **313**, 112203.
- [116] N. Izadi, M. J. de Boer, J. W. Berenschot and G. J. Krijnen, *Journal of micromechanics and microengineering*, 2010, **20**, 085041.
- [117] A. Dagamseh, R. J. Wiegerink, T. S. Lammerink and G. J. Krijnen, *Bioinspiration & biomimetics*, 2012, **7**, 046009.
- [118] G. J. Krijnen, M. Dijkstra, J. J. van Baar, S. S. Shankar, W. J. Kuipers, R. J. de Boer, D. Altpeter, T. S. Lammerink and R. Wiegerink, *Nanotechnology*, 2006, **17**, S84.
- [119] M. M. Sadeghi, B. R. Peterson and K. Najafi, *HAIR Based Sensing and Actuation*, Michigan univ ann arbor dept of electrical engineering and computer science technical report, 2012.
- [120] J. P. Wissman, K. Sampath, S. E. Freeman and C. A. Rohde, *Sensors*, 2019, **19**, 2639.
- [121] R. Sarlo and D. Leo, *Smart Materials, Adaptive Structures and Intelligent Systems*, 2013, p. V002T06A016.
- [122] R. J. DiSabatino Jr, F. P. McCluskey, A. B. Flatau and B. J. Stadler, *Smart Structures and Materials 2006: Smart Electronics, MEMS, BioMEMS, and Nanotechnology*, 2006, p. 617217.
- [123] P. R. Downey, A. B. Flatau, P. D. McGary and B. J. Stadler, *Sensors and Smart Structures Technologies for Civil, Mechanical, and Aerospace Systems 2008*, 2008, p. 69320P.
- [124] R. Jain, F. P. McCluskey, A. B. Flatau and B. J. Stadler, *Nanosensors, Microsensors, and Biosensors and Systems 2007*, 2007, p. 652805.
- [125] R. Jain, F. P. McCluskey and A. B. Flatau, *IEEE Transactions on Components, Packaging and Manufacturing Technology*, 2011.
- [126] A. Alfadhel, B. Li, A. Zaher, O. Yassine and J. Kosel, *Lab on a Chip*, 2014, **14**, 4362–4369.
- [127] A. Alfadhel, B. Li and J. Kosel, *SENSORS*, 2014 IEEE, 2014, pp. 2066–2069.
- [128] Z. Liang, X. Guo, B. Yang and T. Zhang, *Sensors*, 2020, **20**, 4483.
- [129] X. Guo, B. Yang, C. Li and Z. Liang, *Journal of Micromechanics and Microengineering*, 2020, **31**, 025001.
